# Supplementary material for: Exploring the density and morphology of coconut structures at two locations: a time-based analysis using computer tomography
Source: PeerJ. 2024 Oct 14;12:e18206. doi: 10.7717/peerj.18206 (PMC11485131; doi:10.7717/peerj.18206)
Supplement: Supplemental Information 2 — The test materials and data record tables for coconut CT testing [file peerj-12-18206-s002.xlsx]

## Sheet: CT Value
time	group	num	Embryo	Shoot	Solid endoperm	Endocarp	Mesocarp	coconut water
time 1	Ding'an	1	-489	-46	36	218	-896	12
time 1	Ding'an	2	-676	33	28	182	-910	2
time 1	Ding'an	3			31	253	-873	16
time 1	Ding'an	4	66		13	201	-882	6
time 1	Ding'an	5			26	282	-919	5
time 1	Ding'an	6			22	254	-909	15
time 1	Ding'an	7	-722	38	31	212	-903	20
time 1	Ding'an	8	-355	42	46	290	-904	5
time 1	Ding'an	9			32	243	-875	13
time 1	Ding'an	10	-713	-71	18	193	-867	13
time 1	Ding'an	11	-315	-196	35	227	-918	15
time 1	Ding'an	12			59	262	-885	4
time 1	Ding'an	13	-129		31	224	-868	6
time 1	Ding'an	14	-337	53	19	179	-902	16
time 1	Ding'an	15			47	258	-893	7
time 1	Ding'an	16	-808	37	55	144	-886	8
time 1	Ding'an	17	-647	15	36	282	-893	20
time 1	Ding'an	18	52		22	106	-896	10
time 1	Ding'an	19	-380	-75	10	106	-850	7
time 1	Ding'an	20	-607	38	22	215	-903	16
time 1	Ding'an	21	-186	28	31	178	-885	5
time 1	Ding'an	22			29	126	-885	7
time 1	Ding'an	23	-227	24	10	267	-890	17
time 1	Ding'an	24	-405	-61	12	202	-882	11
time 1	Ding'an	25	-444	44	40	254	-911	22
time 1	Ding'an	26	-206	16	15	186	-659	11
time 1	Ding'an	27	-388	56	49	136	-877	12
time 1	Ding'an	28			15	230	-153
time 1	Ding'an	29	70		31	230	-854	6
time 1	Ding'an	30	10		9	238	-830	-3
time 1	Ding'an	31	-531	34	26	251	-851	12
time 1	Ding'an	32			13	233	-832	6
time 1	Ding'an	33	-702	23	13	221	-897	11
time 1	Ding'an	34			26	193	-882	10
time 1	Ding'an	35			27	176	-842	-1
time 1	Ding'an	36			3	285	-903	-2
time 1	Ding'an	37	-206	36	24	232	-911	11
time 1	Ding'an	38			24	221	-811	3
time 1	Ding'an	39	-865	5	31	214	-888	17
time 1	Ding'an	40	-837	4	18	152	-903	13
time 1	Ding'an	41	-611	23	13	271	-894	18
time 1	Ding'an	42	-804	32	28	147	-858	10
time 1	Ding'an	43	-686	23	14	196	-901	16
time 1	Ding'an	44	-616	13	34	213	-871	16
time 1	Ding'an	45	-38	13	16		162	24
time 1	Ding'an	46	-288		6	284	-861	10
time 1	Ding'an	47			53	209	-886	9
time 1	Ding'an	48			51	147	-498
time 2	Ding'an	1	-695	-677	27	196	-890	17
time 2	Ding'an	2	-728	-55	18	174	-885	17
time 2	Ding'an	3			37	206	-897	11
time 2	Ding'an	4			37	243	-887	14
time 2	Ding'an	5			29	236	-860	15
time 2	Ding'an	6			21	247	-881	15
time 2	Ding'an	7	-774	-51	26	228	-886	30
time 2	Ding'an	8	-654	-464	41	171	-875	21
time 2	Ding'an	9			53	233	-796	16
time 2	Ding'an	10	-836	-74	20	118	-865	11
time 2	Ding'an	11	-629	-500	26	118	-865	13
time 2	Ding'an	12			41	169	-875	10
time 2	Ding'an	13	-304	38	47	140	-861	14
time 2	Ding'an	14	-667	-55	24	186	-871	10
time 2	Ding'an	15			37	188	-853	12
time 2	Ding'an	16	-854	20	40	153	-868	19
time 2	Ding'an	17	-721	39	40	232	-890	15
time 2	Ding'an	18			25	178	-887	20
time 2	Ding'an	19	-533	-473	18	148	-877	21
time 2	Ding'an	20	-731	17	24	223	-871	12
time 2	Ding'an	21	-557	3	17	109	-843	6
time 2	Ding'an	22	-41	-7	22	143	-784	13
time 2	Ding'an	23	-806	3	44	268	-884	12
time 2	Ding'an	24	-655	-38	22	184	-883	17
time 2	Ding'an	25	-703	35	13	179	-930	18
time 2	Ding'an	26	-491	-309	16	198	-675	20
time 2	Ding'an	27	-645	22	34	204	-879	22
time 2	Ding'an	28			-15	245	-548
time 2	Ding'an	29			29	265	-503	7
time 2	Ding'an	30			4	283	-804	13
time 2	Ding'an	31	-637	-107	18	187	-835	9
time 2	Ding'an	32			23	208	-592	15
time 2	Ding'an	33	-792	16	25	174	-873	20
time 2	Ding'an	34			35	201	-835	14
time 2	Ding'an	35			27	202	-841	11
time 2	Ding'an	36			3	187	-852	8
time 2	Ding'an	37	-379	-98	30	238	-877	15
time 2	Ding'an	38			39	227	-805	7
time 2	Ding'an	39	-891	53	22	285	-860	22
time 2	Ding'an	40	-842	11	36	220	-891	13
time 2	Ding'an	41	-639	9	8	126	-892	4
time 2	Ding'an	42	-816	40	47	141	-896	13
time 2	Ding'an	43	-736	26	36	220	-901	12
time 2	Ding'an	44	-811	12	30	217	-874	5
time 2	Ding'an	45	-139	-40	20	226	-849	13
time 2	Ding'an	46	-105		11	241	-898	14
time 2	Ding'an	47			28	178	-844	21
time 2	Ding'an	48			-38	283	-734
time 3	Ding'an	1	-705	-65	16	190	-878	9
time 3	Ding'an	2	-621	-40	16	205	-898	9
time 3	Ding'an	3			43	184	-851	18
time 3	Ding'an	4			23	205	-877	16
time 3	Ding'an	5			19	216	-800	18
time 3	Ding'an	6			22	170	-906	7
time 3	Ding'an	7	-797	-87	26	215	-861	24
time 3	Ding'an	8	-754	22	25	179	-875	20
time 3	Ding'an	9			50	114	-881	21
time 3	Ding'an	10	-838	27	38	180	-856	17
time 3	Ding'an	11	-597	-311	24	130	-840	16
time 3	Ding'an	12			31	219	-41	12
time 3	Ding'an	13	-537	-246	25	272	-816	17
time 3	Ding'an	14	-681	-156	18	188	-891	14
time 3	Ding'an	15	-875		60	256	-875	17
time 3	Ding'an	16	-875	25	26	205	-889	18
time 3	Ding'an	17	-758	27	27	230	-903	19
time 3	Ding'an	18			43	223	-888	10
time 3	Ding'an	19	-711	-825	25	98	-874	19
time 3	Ding'an	20	-768	33	31	228	-871	16
time 3	Ding'an	21	-716	5	21	130	-844	14
time 3	Ding'an	22	-216	9	27	185	-855	21
time 3	Ding'an	23	-777	32	20	213	-912	10
time 3	Ding'an	24	-667	5	21	120	-875	7
time 3	Ding'an	25	-763	-37	27	235	-906	20
time 3	Ding'an	26	-619	-11	44	294	-850	26
time 3	Ding'an	27	756	7	61	113	-902	14
time 3	Ding'an	28			-18	139	-865
time 3	Ding'an	29			37	218	-858	16
time 3	Ding'an	30			32	293	-899	13
time 3	Ding'an	31	-604	3	12	149	-852	7
time 3	Ding'an	32			45	190	-796	12
time 3	Ding'an	33	-779	15	22	132	-882	20
time 3	Ding'an	34			54	123	-868	18
time 3	Ding'an	35			23	237	-851	13
time 3	Ding'an	36			16	267	-910	19
time 3	Ding'an	37	-714	-32	28	245	-882	9
time 3	Ding'an	38	20	-641	19	235	-825	15
time 3	Ding'an	39	-876	50	50	244	-882	30
time 3	Ding'an	40	-851	19	4	228	-872
time 3	Ding'an	41	-659	13	19	174	-883	8
time 3	Ding'an	42	-803	34	58	193	-903	17
time 3	Ding'an	43	-767	13	19	233	-894	12
time 3	Ding'an	44	-817	13	27	239	-891	12
time 3	Ding'an	45	-381	-394	43	118	-863	12
time 3	Ding'an	46	-317		15	147	-877	24
time 3	Ding'an	47	-83	-207	42	136	-875	19
time 3	Ding'an	48			-44	230	-896
time 4	Ding'an	1	-688	-161	24	143	-819	9
time 4	Ding'an	2	-573	-330	31	193	-868	10
time 4	Ding'an	3			36	187	-859	14
time 4	Ding'an	4			13	183	-863	11
time 4	Ding'an	5			52	209	-868	17
time 4	Ding'an	6			41	191	-903	12
time 4	Ding'an	7	-777	-407	19	187	-856	21
time 4	Ding'an	8	-761	-20	25	140	-872	17
time 4	Ding'an	9			57	236	-875	33
time 4	Ding'an	10	-876	24	19	143	-835	12
time 4	Ding'an	11	-483	-424	22	129	-825	21
time 4	Ding'an	12			28	158	-851	19
time 4	Ding'an	13	-665	53	51	156	-863	15
time 4	Ding'an	14	-715	18	17	113	-881	11
time 4	Ding'an	15			60	182	-898	12
time 4	Ding'an	16	-908	14	55	183	-886	31
time 4	Ding'an	17	-753	14	20	191	-903	18
time 4	Ding'an	18			29	151	-909	16
time 4	Ding'an	19	-754	-818	23	179	-835	20
time 4	Ding'an	20	-791	34	37	254	-873	15
time 4	Ding'an	21	-728	-17	19	155	-863	9
time 4	Ding'an	22	-336	12	35	166	-810	17
time 4	Ding'an	23	-826	26	17	276	-863	14
time 4	Ding'an	24	-704	25	16	178	-859	9
time 4	Ding'an	25	-767	-3	26	121	-891	20
time 4	Ding'an	26	-725	20	23	161	-884	17
time 4	Ding'an	27	-761	13	41	195	-869	14
time 4	Ding'an	28			-48	228	-726
time 4	Ding'an	29			50	213	-850	9
time 4	Ding'an	30			10	130	-910	10
time 4	Ding'an	31	-628	43	13	167	-856	5
time 4	Ding'an	32			15	204	-830	15
time 4	Ding'an	33	-789	34	14	141	-877	22
time 4	Ding'an	34			42	152	-869	18
time 4	Ding'an	35			26	235	-756	17
time 4	Ding'an	36			26	228	-870	14
time 4	Ding'an	37	-689	-28	18	121	-888	5
time 4	Ding'an	38	36	-342	10	167	-830	16
time 4	Ding'an	39	-916	57	51	235	-922
time 4	Ding'an	40	-860	10	7	162	-903
time 4	Ding'an	41	-715	7	46	132	-886	9
time 4	Ding'an	42	-825	24	19	162	-872	18
time 4	Ding'an	43	-861	15	15	208	-887	3
time 4	Ding'an	44	-835	3	37	210	-852	10
time 4	Ding'an	45	-620	-42	30	179	-878	20
time 4	Ding'an	46	-301		19	202	-897	18
time 4	Ding'an	47	-189	13	52	120	-861	10
time 4	Ding'an	48			-80	153	-849
time 1	Wenchang	101	-141		29	162	-883	17
time 1	Wenchang	102	-146		6	231	-766	13
time 1	Wenchang	103	-155		17	256	-880	12
time 1	Wenchang	104	-321	15	17	220	-741	12
time 1	Wenchang	105	-744	36	10	199	-871	42
time 1	Wenchang	106			14	242	-544	12
time 1	Wenchang	107	-459	22	14	155	-882	19
time 1	Wenchang	108			9	158	-748	11
time 1	Wenchang	109			6	147	-881	21
time 1	Wenchang	110	-78		35	262	-898	23
time 1	Wenchang	111			21	124	-769	9
time 1	Wenchang	112			21	103	-842	25
time 1	Wenchang	113			23	275	-905	13
time 1	Wenchang	114	-16		7	146	-858	26
time 1	Wenchang	115	-87		14	195	-875	8
time 1	Wenchang	116	47		18	171	-859	13
time 1	Wenchang	117	-627	40	50	269	-870	21
time 1	Wenchang	118	47		25	257	-873	13
time 1	Wenchang	119	60		20	239	-832	17
time 1	Wenchang	120	64		19	188	-857	8
time 1	Wenchang	121	-33		6	148	-891	6
time 1	Wenchang	122	78		28	132	-835	20
time 1	Wenchang	123	54		12	208	-824	30
time 1	Wenchang	124	-255	1	31	156	-883	13
time 1	Wenchang	125	62		13	89	-893	26
time 1	Wenchang	126	-84		44	168	-878	8
time 1	Wenchang	127	71		49	274	-776	20
time 1	Wenchang	128	-876	4	9	213	-871
time 3	Wenchang	101	-643	30	12	198	-881	17
time 3	Wenchang	102	-726	-235	30	211	-871	16
time 3	Wenchang	103	-243		10	146	-848	8
time 3	Wenchang	104	-722	2	19	232	-859	18
time 3	Wenchang	105	-771	62	28	255	-890
time 3	Wenchang	106			25	176	-890	14
time 3	Wenchang	107	-702	29	58	120	-858	27
time 3	Wenchang	108			23	226	-641	13
time 3	Wenchang	109	-267	-63	27	116	-893	7
time 3	Wenchang	110	-604	-41	41	232	-919	26
time 3	Wenchang	111			17	194		12
time 3	Wenchang	112	-11	-664	27	125	-850
time 3	Wenchang	113			33	145	-903
time 3	Wenchang	114	-469	-94	46	132	-833	26
time 3	Wenchang	115			44	187	-922	9
time 3	Wenchang	116	-785	11	43	238	-859	26
time 3	Wenchang	117			30	116	-904	18
time 3	Wenchang	118	4	-50	23	249	-892	10
time 3	Wenchang	119	-155	-72	46	236	-890	21
time 3	Wenchang	120	-327	-235	30	176	-869	15
time 3	Wenchang	121	-499	45	55	153	-873	24
time 3	Wenchang	122	-535	-375	62	175	-850	22
time 3	Wenchang	123	-338	27	29	163	-861	25
time 3	Wenchang	124	-673	-21	28	181	-896	17
time 3	Wenchang	125			32	242	-873	22
time 3	Wenchang	126	-72		22	145	-856	11
time 3	Wenchang	127			27	124	-917	11
time 3	Wenchang	128	-946	25	5	191	-813
time 4	Wenchang	101	-712	-20	42	243	-860	22
time 4	Wenchang	102	-730	-217	53	214	-867	15
time 4	Wenchang	103			28	242	-843	15
time 4	Wenchang	104	-756	23	34	175	-867	17
time 4	Wenchang	105	-785	36	28	158	-889
time 4	Wenchang	106			37	99	-852	14
time 4	Wenchang	107	-743	40	28	198	-882	24
time 4	Wenchang	108			38	212	-874	11
time 4	Wenchang	109	-633	-67	46	132	-893	15
time 4	Wenchang	110	-666	-78	59	207	-905	23
time 4	Wenchang	111			11	81	-851
time 4	Wenchang	112	-413	-389	28	102	-851	25
time 4	Wenchang	113			16	229	-893
time 4	Wenchang	114	-742	-43	24	224	-814	22
time 4	Wenchang	115				252	-839	12
time 4	Wenchang	116	-805	23	38	266	-865	8
time 4	Wenchang	117			37	245	-889	17
time 4	Wenchang	118	-489	45	21	159	-867	20
time 4	Wenchang	119	-609	1	52	198	-860	20
time 4	Wenchang	120	-388	-32	25	146	-892	23
time 4	Wenchang	121	-710	42	33	168	-857	14
time 4	Wenchang	122	-737	-371	29	146	-827	20
time 4	Wenchang	123	-598	33	19	122	-806	26
time 4	Wenchang	124	-742	27	31	104	-847	12
time 4	Wenchang	125	-9	23	53	107	-886	18
time 4	Wenchang	126	-72		36	107	-854	17
time 4	Wenchang	127	-68		28	223	-829	9
time 4	Wenchang	128	-975	8	50	187	-798
time 2	Wenchang	101	-500	13	13	217	-873	17
time 2	Wenchang	102	-499	-75	15	158	-859	14
time 2	Wenchang	103	-189		10	252	-878	7
time 2	Wenchang	104	-627	49	22	156	-866	18
time 2	Wenchang	105	-868	76	13	144	-890
time 2	Wenchang	106			5	187	-839	22
time 2	Wenchang	107	-641	33	33	208	-647	22
time 2	Wenchang	108			6	146	-910	18
time 2	Wenchang	109	-113	-60	11	158	-891	18
time 2	Wenchang	110	-465	50	21	323	-902	27
time 2	Wenchang	111			2	107	-881	10
time 2	Wenchang	112			15	100	-880	24
time 2	Wenchang	113			32	244	-861
time 2	Wenchang	114	-314	4	26	117	-826	23
time 2	Wenchang	115			5	256	-930	7
time 2	Wenchang	116	-735	19	51	219	-901	20
time 2	Wenchang	117	56		35	238	-925	17
time 2	Wenchang	118	-9	4	31	199	-884	5
time 2	Wenchang	119	-131	35	35	177	-873	21
time 2	Wenchang	120	-200	6	5	238	-891	8
time 2	Wenchang	121	-291	39	13	112	-867	18
time 2	Wenchang	122	-272	56	2	192	-859	23
time 2	Wenchang	123	-279	26	10	182	-903	19
time 2	Wenchang	124	-522	45	22	171	-853	17
time 2	Wenchang	125	59		18	237	-896	14
time 2	Wenchang	126	-55		17	128	-851	22
time 2	Wenchang	127	60		47	239	-884	14
time 2	Wenchang	128	-915	23	49	263	-898

## Sheet: Morphological parameters 
time	group	num	weight	major axis of coconuts	minor axis of coconuts	major axis of coconut apple	minor axis of coconut apple	Endocarp thickness	Mesocarp thickness	major axis of coconut water	minor axis of coconut water	thickness of solid endosperm	volume of coconut water	height of bud
time 1	Ding'an	1	909	19.13	15.67	3.12	2.87	0.26	2.91	7.56	6.32	1.04	189.11	1.58
time 1	Ding'an	2	859	19.13	15.32	4.9	4.53	0.21	2.42	7.27	5.78	0.97	147.75	1.58
time 1	Ding'an	3	954	18.94	15.52			0.34	1.83	8.02	4.53	1.21	155.14
time 1	Ding'an	4	911	21.17	15.89			0.21	2.38	7.44	7.11	0.93	185.69
time 1	Ding'an	5	869	20.17	14.86			0.21	2.13	7.52	4.61	0.81	147.84
time 1	Ding'an	6	995	19.7	15.64			0.25	2.7	8.43	5.94	0.87	201.79
time 1	Ding'an	7	843	17.81	5.76	4.22	4.27	0.33	2.56	7.62	4.71	0.85	75.96	2.72
time 1	Ding'an	8	1043	19.79	16.35	2.36	1.85	0.31	1.69	8.83	5.63	1.1	205.03	1.62
time 1	Ding'an	9	774	19.88	14.95			0.18	2.27	7.34	6.16	0.9	142.25
time 1	Ding'an	10	946	20.59	15.03	4.55	4.6	0.21	1.66	7.83	4.59	1.07	137	3.06
time 1	Ding'an	11	848	20.57	14.29	2.67	2.08	0.21	2.11	7.27	6.38	1.11	173.41	2.58
time 1	Ding'an	12	971	18.66	11.12			0.33	2.02	8.04	4.75	1.06	169.75
time 1	Ding'an	13	1051	18.52	16.38			0.21	2.17	9.48	5.39	0.98	185.97
time 1	Ding'an	14	919	21.24	15.85	2.36	1.82	0.18	1.98	7.49	6.68	1	178.41	1.47
time 1	Ding'an	15	1048	18.95	16.15			0.32	2.36	8.54	5.79	0.91	204.87
time 1	Ding'an	16	843	19.14	14.89	4.78	4.54	0.28	2.47	7.46	4.3	0.94	110.27	4.02
time 1	Ding'an	17	1006	19.36	16.44	6.24	5.54	0.29	2.64	8.31	5.15	0.91	149.99	5.87
time 1	Ding'an	18	913	18.91	15.13			0.24	2.35	7.16	7.1	1.01	188.76
time 1	Ding'an	19	752	16.71	13.7	2.39	1.42	0.19	1.77	6.97	5.52	1.22	141.32	0.88
time 1	Ding'an	20	1039	19.36	16.22	3.87	2.98	0.23	2.55	7.96	6.21	1	199.07	2.87
time 1	Ding'an	21	986	19.02	16.57	1.49	1.39	0.22	2.02	7.88	7.18	0.88	233.51	1.24
time 1	Ding'an	22	953	18.61	14.93			0.25	1.83	6.94	7.06	1.28	220.41
time 1	Ding'an	23	1290	19.56	17.87	5.58	5.54	0.28	2.26	9.54	6.5	0.61	223.78	4.81
time 1	Ding'an	24	973	19.73	15.22	2.55	1.83	0.28	2.17	7.18	6.38	0.9	154.09	1.63
time 1	Ding'an	25	1250	19.84	17.22	2.12	1.92	0.21	2.88	9.22	6.41	0.82	230.64	1.62
time 1	Ding'an	26	1027	18.48	16.99	1.71	1.36	0.29	3.06	6.85	2.33	1.18	42.4	0.96
time 1	Ding'an	27	1179	20.26	15.7	2.46	1.84	0.33	2.38	7.1	5.72	1	159.68	1.68
time 1	Ding'an	28	1229	18.97	14.85			0.29	1.44			0.57
time 1	Ding'an	29	1167	18.56	14.94			0.24	2.4	6.82	7.16	1.01	191.25	2.19
time 1	Ding'an	30	891	18.14	16.13			0.33	2.96	7.18	3.04	0.79	83.05
time 1	Ding'an	31	1005	19.54	15.22	3.66	3.4	0.31	2.14	7.66	7.06	1	175.32	2.26
time 1	Ding'an	32	1521	19.52	15.72			0.31	1.95	9.03	5.67	1.09	226.22
time 1	Ding'an	33	803	18.14	16.09	3.66	3.13	0.41	2.69	7.76	4.62	0.64	108.78
time 1	Ding'an	34	1006	18.67	15.98			0.32	2.27	8.15	5.77	1.02	202.6
time 1	Ding'an	35	1253	20.21	14.08			0.31	3.34	5.96	4.99	0.6	66.86	1.2
time 1	Ding'an	36	716	14.11	19.18			0.26	2.59	6.63	5.18	0.93	108.29
time 1	Ding'an	37	1345	19.74	16.6	1.84	1.25	0.28	3.11	8.66	7.12	0.79	246.81
time 1	Ding'an	38	1129	19.33	15.78			0.2	1.65	8.67	5.89	0.88	215.76
time 1	Ding'an	39	1031	18.56	16.3	7.11	7.53	0.33	2.06	8.13	2.97	0.94	79.04	6.79
time 1	Ding'an	40	1114	20.19	16.43	6.88	6.56	0.39	2.7	6.86	3.44	0.97	97.12	7.42
time 1	Ding'an	41	1256	19.93	17.86	6.5	5.95	0.39	2.64	8.16	4.42	0.94	163.11	7.17
time 1	Ding'an	42	1056	18.84	16.52	6.75	6.3	0.34	2.6	8.31	2.84	1.07	131.49	7.04
time 1	Ding'an	43	1209	20.66	17.12	5.83	5.74	0.29	2.95	8.28	6.05	0.78	176.58	4.26
time 1	Ding'an	44	1567	19.55	18.22	8.37	7.84	0.34	2.4	9.48	2.81	1.01	116.7	5.94
time 1	Ding'an	45	1841	16.06	18.08			0.26	1.97	11.86	6.02	0.96	361.39
time 1	Ding'an	46	1427	19.31	18.95	2.56	0.98	0.59	2.63	9.56	2.1	1.18	68.65
time 1	Ding'an	47	2247	19.47	17.9			0.24	2.41	12.88	6.36	1.26	481.57
time 1	Ding'an	48	1411	18.66	16.81			0.29	2.63			1.16
time 2	Ding'an	1	891	19.2	15.45	5.17	4.95	0.29	2.48	7.38	5.81	1	184.97	1.78
time 2	Ding'an	2	840	19.34	15.31	6.89	6.67	0.25	2.24	7.31	4.03	1.02	154.1	1.51
time 2	Ding'an	3	942	19.18	15.42			0.24	1.76	8.17	4.58	1.09	177.17
time 2	Ding'an	4	896	20.23	15.66			0.22	2.51	7.42	6.83	1.11	226.79
time 2	Ding'an	5	859	19.88	14.99			0.21	1.54	4.46	1.95	1.13	166.7
time 2	Ding'an	6	985	19.55	15.17			0.3	2.3	8.24	5.67	0.89	251.6
time 2	Ding'an	7	830	17.58	15.66	5.56	5.48	0.22	2.32	7.57	3.78	0.93	99.4	5.08
time 2	Ding'an	8	1030	20.88	16.3	4.47	4.3	0.24	1.73	8.76	5.09	0.82	213.85	2.96
time 2	Ding'an	9	766	19.76	15.13			0.24	2.18	7.01	5.88	1.12	146.15
time 2	Ding'an	10	930	20.6	15.15	6.43	5.98	0.27	1.64	8.26	3.68	1.13	174.21	5.15
time 2	Ding'an	11	822	20.8	14.24	3.41	2.7	0.19	2.14	7.24	6.03	1.01	187.04	2.75
time 2	Ding'an	12	956	18.6	17.14			0.27	1.97	8.41	4.5	0.89	188.17
time 2	Ding'an	13	1033	18.59	16.13	1.85	1.18	0.27	1.62	9.47	5.12	1	249.56	1.02
time 2	Ding'an	14	899	21.35	15.86	4.66	4.54	0.19	2.26	7.58	5.75	1.05	221.83	2.73
time 2	Ding'an	15	1033	20.55	15.83			0.25	2.19	8.83	5.51	1.07	232.35
time 2	Ding'an	16	823	19.07	15.07	6.26	6.01	0.28	2.64	7.6	3.54	0.96	104.83	7.74
time 2	Ding'an	17	975	21.25	16.26	7.2	6.36	0.2	2.44	8.23	4.48	1.03	152.83	11.59
time 2	Ding'an	18	887	19.61	15.02			0.19	2.32	7.22	6.67		226.33
time 2	Ding'an	19	740	17.24	13.63	3.56	2.53	0.23	2.03	6.98	5.23	1.08	161.36	2.51
time 2	Ding'an	20	1020	19.19	16.09	5.16	4.73	0.26	1.94	8.12	6.16	0.97	224.9	3.95
time 2	Ding'an	21	988	20.52	16.52	3.65	3.62	0.31	1.68	7.76	6.62	1.11	266.32	2.1
time 2	Ding'an	22	950	18.81	14.63	0.88	0.73	0.19	2.07	6.99	6.66	1.18	239.35	0.69
time 2	Ding'an	23	1178	20.76	17.74	6.57	6.29	0.37	1.89	9.24	7.43	0.65	302.83	6.47
time 2	Ding'an	24	852	19.43	15.04	4.55	4.54	0.25	2.29	7.12	6.16	1.04	198.98	3.84
time 2	Ding'an	25	1214	21.41	17.18	4.21	4.03	0.18	2.76	8.94	6.23	0.61	263.8	3.43
time 2	Ding'an	26	1142	18.89	17.01	3.24	2.76	0.35	3.31	6.98	2.03	1.17	63.48	1.94
time 2	Ding'an	27	987	20.16	15.51	4.16	3.89	0.24	2.28	7.13	5.3	1.12	157.55	2.74
time 2	Ding'an	28	1133	19.38	15.37			0.27	2.24			0.92	0
time 2	Ding'an	29	1123	18.89	15.35			0.38	2.83	7.06	7.02	1.15	230.95
time 2	Ding'an	30	863	18.11	16.24			0.22	2.79	7.36	3.27	0.95	122.74
time 2	Ding'an	31	936	20.89	15.19	5.5	5.03	0.31	2.41	7.26	6.37	1.04	228.14	3.26
time 2	Ding'an	32	1470	19.59	15.81			0.21	1.9	8.99	5.5	1.02	258.1
time 2	Ding'an	33	799	18.02	16.33	6.06	5.17	0.31	2.62	7.36	3.83	0.8	120.01	4.06
time 2	Ding'an	34	1013	18.91	15.76			0.2	2.19	8.02	5.38	1.11	239.54
time 2	Ding'an	35	1173	20.34	14.58			0.32	3.07	5.96	4.4	0.44	90.84
time 2	Ding'an	36	717	18.71	14.07			0.23	2.95	6.67	5.23	0.85	198.5
time 2	Ding'an	37	1096	19.71	16.27	3.81	3.09	0.26	2.85	8.51	6.75	0.95	280.48	2.65
time 2	Ding'an	38	983	19.39	15.46			0.27	1.51	8.38	5.5	0.92	236.77
time 2	Ding'an	39	940	19.06	16.07	8.36	8.33	0.37	2.14	7.85	2.47	1.11	86.85	8.97
time 2	Ding'an	40	942	20.11	16.41	8.06	7.2	0.21	2.6	6.5	2.34	0.76	81.78	15.73
time 2	Ding'an	41	1124	19.74	17.97	7.17	6.85	0.26	3.09	8.5	3.71	0.94	214.52	9.61
time 2	Ding'an	42	975	19.45	16.97	7.87	7.42	0.25	2.59	8.06	4.21	1.03	174.18	8.45
time 2	Ding'an	43	1082	20.66	16.75	7.04	6.69	0.25	3.12	8.19	5.22	0.99	211.27	9.16
time 2	Ding'an	44	1405	19.61	17.8	8.06	8.12	0.37	2.08	9.35	2.3	1.02	188.54	8.46
time 2	Ding'an	45	1649	17.82	15.87	1.61	1.57	0.33	1.77	11.58	6.04	0.73	476.06	1.55
time 2	Ding'an	46	1260	18.95	18.51	2.41	0.61	0.45	2.68	9.35	2.27	1.2	136.41
time 2	Ding'an	47	2074	19.27	18.01			0.25	2.17	12.37	5.95	1.14	594.01
time 2	Ding'an	48	1080	18.62	17.05			0.19	2.54			0.96
time 3	Ding'an	1	878	19.08	15.7	6.42	6.1	0.31	2.72	7.39	5.56	1.02	161.1	1.81
time 3	Ding'an	2	822	19.63	15.36	8.03	7.24	0.18	2.49	7.15	4.11	0.98	114.23	1.91
time 3	Ding'an	3	928	19.09	15.89			0.32	1.5	8.06	4.14	1.23	159.97
time 3	Ding'an	4	883	20.34	15.82			0.2	2.76	7.51	6.28	1.06	221.13
time 3	Ding'an	5	846	19.89	14.62			0.26	1.89	7.67	4.25	1.21	156.11
time 3	Ding'an	6	970	19.73	16.37			0.22	2.96	8.81	5.53	1.2	235.09
time 3	Ding'an	7	814	17.56	15.85	6.65	6.46	0.22	2.91	7.75	3.17	1.16	74.34	7.72
time 3	Ding'an	8	1013	20.87	16.49	6.47	6.44	0.23	1.58	8.8	4.41	1.27	196.52	4.68
time 3	Ding'an	9	755	19.86	14.95			0.27	2.22	6.79	5.26	0.88	121.39
time 3	Ding'an	10	911	20.55	15.53	7.6	7	0.21	1.57	7.94	3.38	1.19	122.75	6.6
time 3	Ding'an	11	807	20.65	14.23	3.87	3.01	0.16	2.28	7.19	5.66	1.23	169.51	0.89
time 3	Ding'an	12	942	19.91	17.11			0.22	2.04	8.39	4.37	1.18	170.61
time 3	Ding'an	13	1009	18.7	16.17	3.25	2.47	0.32	2.14	9.25	4.6	0.96	222.1	1.86
time 3	Ding'an	14	865	21.35	15.68	6.43	6.37	0.16	2.28	7.52	5.29	1.12	169.89	4.51
time 3	Ding'an	15	1015	19.64	15.88			0.27	2.09	8.87	5.26	1.1	222.65
time 3	Ding'an	16	798	19.87	15.11	6.96	6.95	0.27	2.67	6.87	2.79	1.05	64.2	10.12
time 3	Ding'an	17	950	19.21	16.29	8.07	6.86	0.23	2.68	7.03	3.7	1	102.04	13.13
time 3	Ding'an	18	872	19.21	14.95			0.22	2.28	7.29	6.21	1.14	205.33
time 3	Ding'an	19	716	16.62	15.8	4.07	3.52	0.23	2.06	6.87	4.36	1.12	132.26	0.57
time 3	Ding'an	20	973	20.13	16.09	6.01	5.9	0.26	2.01	8.07	6.25	0.9	214.16	6.15
time 3	Ding'an	21	942	19.09	16.18	5.75	5.68	0.23	1.58	7.73	5.77	1.15	217.03	4.23
time 3	Ding'an	22	900	18.09	14.77	1.83	1.67	0.27	2.06	6.93	6.3	1.25	208.63	1.78
time 3	Ding'an	23	1126	19.23	17.62	7.45	6.92	0.33	2.21	9.22	4.71	0.84	204.83	9.41
time 3	Ding'an	24	803	19.5	14.99	6.18	6.15	0.34	2.39	6.93	5.78	0.97	161.59	5.21
time 3	Ding'an	25	1122	21.13	16.96	5.98	5.01	0.23	2.71	8.85	5.87	1	251.29	5.05
time 3	Ding'an	26	864	18.33	16.76	4.18	4.08	0.26	2.96	6.69	2.02	1.12	65	3.21
time 3	Ding'an	27	886	21.17	15.55	5.3	4.99	0.33	2.28	7.39	5.1	0.89	137.22	4.2
time 3	Ding'an	28	710	19.3	15.37			0.22	2.77			0.91	0
time 3	Ding'an	29	982	18.57	15.22			0.33	2.56	6.69	6.62	1.15	218.98
time 3	Ding'an	30	766	17.76	15.46			0.26	2.63	7.16	2.97	0.81	106.71
time 3	Ding'an	31	863	19.63	14.94	6.93	6.47	0.22	2.43	7.31	5.13	0.95	170.42	4.87
time 3	Ding'an	32	1338	20.02	15.76			0.38	1.89	8.81	5.48	1.07	254.92
time 3	Ding'an	33	780	19.12	16.24	7.02	6.6	0.24	2.52	7.35	3.02	1.1	91.61	6.24
time 3	Ding'an	34	999	19.14	16.05			0.21	1.87	8.08	5.3	1.18	229.69
time 3	Ding'an	35	1096	20.39	14.4			0.24	3.03	6.05	4.45	0.35	90.04
time 3	Ding'an	36	698	19.04	14.11			0.27	2.72	7.49	4.85	0.91	150.17
time 3	Ding'an	37	1071	19.8	16.6	5.23	4.54	0.2	3.02	8.68	6.68	0.88	273.12	4.82
time 3	Ding'an	38	984	19.63	15.43	0.81	0.77	0.28	1.48	8.61	5.68	1.06	220.84	0.53
time 3	Ding'an	39	901	19.11	15.96	8.88	8.58	0.34	2.5	6.64	1.7	1.23	34.5	17.42
time 3	Ding'an	40	909	19.73	16.46	9.29	7.58	0.21	2.29			0.62	0	20.51
time 3	Ding'an	41	1098	21.57	18.16	8.07	7.7	0.27	3.12	8.49	4.32	0.76	151.98	17.83
time 3	Ding'an	42	968	20.73	16.89	8.59	7.79	0.17	2.77	7.87	2.64	0.94	100.65	11.23
time 3	Ding'an	43	1053	20.81	16.69	7.93	7.38	0.3	3.33	7.95	4.77	1	151.6	15.91
time 3	Ding'an	44	1323	18.89	18.09	8.45	8.05	0.4	2.65	9.48	2.31	1.21	164.34	9.11
time 3	Ding'an	45	1599	17.73	16.34	3.1	2.5	0.24	1.66	11.64	5.77	1.21	432.77	2.58
time 3	Ding'an	46	1232	18.64	18.56	3.06	0.92	0.4	2.77	9.31	2.27	1.17	139.15
time 3	Ding'an	47	2027	19.44	18.36	0.92	0.65	0.32	2.21	12.94	6.09	1.29	573.25	0.77
time 3	Ding'an	48	962	18.13	17.19			0.34	2.54			1.01
time 4	Ding'an	1	862	19.29	15.54	7.03	6.89	0.28	2.7	7.49	4.52	0.88	152.21	2.14
time 4	Ding'an	2	800	20.06	15.32	8.92	7.44	0.25	2.1	6.91	3.2	1.02	82.92	1.96
time 4	Ding'an	3	913	20.67	15.42			0.3	1.8	7.98	3.74	1.22	160.78
time 4	Ding'an	4	866	21.34	15.97			0.3	2.3	7.43	6	1.05	227.1
time 4	Ding'an	5	830	19.74	14.69			0.24	1.87	7.64	3.84	1.22	168.22
time 4	Ding'an	6	954	21.01	16.06			0.31	2.6	8.27	5.01	1.22	237.33
time 4	Ding'an	7	788	17.63	15.78	7.15	7.08	0.23	2.62	7.24	2.45	1.18	98.19	7.96
time 4	Ding'an	8	984	21.01	16.27	7.77	7.65	0.37	1.95	8.63	3.59	1.18	176.72	7.11
time 4	Ding'an	9	743	21.39	15.09			0.26	2.26	6.87	5.1	0.82	139
time 4	Ding'an	10	887	20.67	15.19	8.36	7.77	0.22	1.44	7.8	2.47	0.87	87.52	9.8
time 4	Ding'an	11	791	20.42	14.33	4.46	3.64	0.25	1.76	7.3	5.2	1.29	151.38	0.53
time 4	Ding'an	12	926	20.16	17.07			0.31	2.02	8.1	3.52	1.23	157.56	2.36
time 4	Ding'an	13	992	19.91	16.68	4.35	3.9	0.19	1.58	9.12	4.32	1.07	221.19	2.4
time 4	Ding'an	14	845	21.54	15.85	7.26	6.78	0.24	2.36	7.47	4	1.02	162.71	5.09
time 4	Ding'an	15	1001	20.96	16.03			0.29	2.23	8.83	4.82	1.15	240.45
time 4	Ding'an	16	780	20.05	15.02	7.5	7.47	0.2	2.64	5.53	1.99	1.05	40.17	12.63
time 4	Ding'an	17	931	21.82	16.3	7.98	7.52	0.18	2.56	7.87	2.81	0.99	85.05	12.92
time 4	Ding'an	18	650	20.02	15			0.21	2.42	7.05	5.71	1.09	221.87
time 4	Ding'an	19	699	16.82	13.14	4.82	4.04	0.34	1.59	6.95	4.03	1.09	138.8	0.55
time 4	Ding'an	20	931	20.73	15.97	7.14	6.89	0.22	1.83	8.35	4.66	0.93	209.73	7.32
time 4	Ding'an	21	913	20.08	15.12	7.11	6.86	0.28	1.6	7.61	4.72	1.14	229.01	6.64
time 4	Ding'an	22	889	19.52	14.77	3.94	3.74	0.28	1.66	7.27	5.53	1.22	237.54	2.4
time 4	Ding'an	23	1097	20.38	17.6	8.32	8	0.31	2.01	8.68	3.28	0.88	208.76	10.6
time 4	Ding'an	24	784	19.96	15.11	7.43	6.92	0.31	2.2	6.95	4.16	0.94	162.18	8.27
time 4	Ding'an	25	1114	20.87	17.03	7.06	5.75	0.3	2.9	8.16	5.27	0.86	280.58	7.22
time 4	Ding'an	26	844	19.74	16.59	5.4	5.21	0.28	3.17	6.8	1.72	1.23	60.83	4.77
time 4	Ding'an	27	893	21.25	15.44	6.81	6.33	0.28	2.32	7.38	4.72	0.93	142.6	6.08
time 4	Ding'an	28	635	20.64	14.75			0.41	1.72			0.82	0
time 4	Ding'an	29	961	20.18	14.71			0.24	2.67	6.8	6.63	1.38	266.91
time 4	Ding'an	30	762	19.35	15.85			0.33	2.84	7.38	2.69	0.88	115.16
time 4	Ding'an	31	857	20.83	15.12	7	6.51	0.32	2	7.09	3.65	1.08	151.68	5.42
time 4	Ding'an	32	1262	19.82	15.76			0.3	1.83	8.81	5.4	1.03	281.77
time 4	Ding'an	33	763	19.72	16.27	7.74	7.68	0.32	2.3	6.81	2.13	1	45.6	10.39
time 4	Ding'an	34	985	20.4	15.66			0.24	1.87	8.11	5.11	1.24	248.46
time 4	Ding'an	35	977	20.33	14.25			0.36	2.83	6.22	4.26	0.29	92.9
time 4	Ding'an	36	679	19.22	14.12			0.21	2.51	6.74	4.33	0.88	168.17
time 4	Ding'an	37	1027	20.7	16.44	6.19	5.69	0.23	2.87	8.47	6.12	0.87	282.27	5.84
time 4	Ding'an	38	963	19.76	15.45	0.73	0.44	0.27	1.41	8.36	5.42	1.12	232.1	0.72
time 4	Ding'an	39	841	18.83	15.79	8.8	8.68	0.33	2.33			1.06	0	14.91
time 4	Ding'an	40	827	21.1	16.43	9.72	7.88	0.31	2.66			0.33	0	18.9
time 4	Ding'an	41	1051	21.27	17.41	8.67	8.23	0.33	2.72	8.65	4.41	0.71	138.43	15.25
time 4	Ding'an	42	925	20.24	16.7	9.66	8.4	0.21	2.52	7.91	0.94	0.8	68.75	12.72
time 4	Ding'an	43	989	20.9	16.82	8.65	7.78	0.29	2.66	7.47	2.78	0.94	122.71	15.19
time 4	Ding'an	44	1265	19.79	18.16	8.31	8.04	0.4	2.48	9.19	1.86	1.14	139.3	10.7
time 4	Ding'an	45	1517	17.9	17.63	4.53	4.55	0.2	1.79	11.34	5.46	1.21	441.36	3.1
time 4	Ding'an	46	1189	19.63	18.93	2.64	0.84	0.36	4.26	9.19	1.95	1.14	173.03
time 4	Ding'an	47	1980	19.37	18.92	1.34	1.27	0.28	2.23	12.65	5.83	1.13	600.64	1.11
time 4	Ding'an	48	886	18.37	17.7			0.26.	1.29			1.18
time 1	Wenchang	101	1394.15	19.57	17.44	无		0.48	4.03	5.7	5.6	0.96
time 1	Wenchang	102	1266.92	19.77	16.31	无		0.28	2.07	3.2	3.16	0.84
time 1	Wenchang	103	805.97	16.7	16.61	1.03	0.58	0.29	2.88	7.36	7.28	0.8
time 1	Wenchang	104	812.93	17.44	14.54	1.6	1.58	0.28	2.6	6.37	5.85	0.68
time 1	Wenchang	105	842.53	16.79	16.31	6.25	3.82	0.27	1.9	6.69	6.72	0.8
time 1	Wenchang	106	1264.56	18.73	17.72	无		0.24	2.23	9.55	8.58	0.86
time 1	Wenchang	107	996.96	16.49	15.21	1.95	1.68	0.28	1.7	7.77	7.32	1.26
time 1	Wenchang	108	1418.78	17.6	17.23	无		0.3	2.3	6.06	5.09	0.83
time 1	Wenchang	109	1185.25	19.31	16.78	无		0.39	2.15	6.85	6.16	1.24
time 1	Wenchang	110	1409.79	18.362	18.3	无		0.23	2.7	9.55	8.99	1.24
time 1	Wenchang	111	1095.77	17.47	16.76	无		0.28	2.01	7.71	6.69	1.35
time 1	Wenchang	112	869.56	16.15	14.18	无		0.12	2.21	6.83	6.53	0.99
time 1	Wenchang	113	1045.61	19.31	18.53	无		0.34	3.88	7.04	6.38	1.33
time 1	Wenchang	114	977.93	16.67	15.53	无		0.17	1.57	8.4	8.28	0.91
time 1	Wenchang	115	932.67	19.22	16.48	无		0.15	3.21	2.71	2.14	0.74
time 1	Wenchang	116	1213.78	18.96	16.7	无		0.35	2.35	8.13	8.07	1.17
time 1	Wenchang	117	1014.43	16.76	16.76	3.37	3.33	0.31	2.31	7.12	6.81	1.13
time 1	Wenchang	118	1034.08	16.46	16.02	无		0.31	3.19	5.05	4.81	1.21
time 1	Wenchang	119	1252.63	21.13	16.15	无		0.38	1.9	7.57	7.08	1.19
time 1	Wenchang	120	1191.71	19.85	16.11	无		0.28	1.79	6.78	6.45	0.87
time 1	Wenchang	121	1160.33	17.81	16.21	无		0.21	2.83	4.92	4.65	1.03
time 1	Wenchang	122	1331.13	19.13	16.23	无		0.43	2.15	6.68	6.53	1.27
time 1	Wenchang	123	1483.88	18.12	16.75	无		0.3	2.08	8.41	7.97	1.15
time 1	Wenchang	124	1296.14	19.29	16.19	无		0.28	1.7	7.38	7.06	1.04
time 1	Wenchang	125	1128.3	18.13	16.31	无		0.26	2.04	8.48	7.85	1.22
time 1	Wenchang	126	720.6	17.32	14.03	无		0.27	2.45	5.44	5.21	1.37
time 1	Wenchang	127	1301.41	17.5	16.72	无		0.38	1.68	7.66	7.3	1.25
time 1	Wenchang	128	992.33	17.63	16.56	9.71	9.27	0.33	2.37	无		1.16
time 2	Wenchang	101	1258	19.68	17.76	2.94	2.83	0.26	3.99	8.53	5.94	249.9	0.83	2.5
time 2	Wenchang	102	1077	20.63	16.97	4.07	2.96	0.26	1.81	7.85	7.75	251.41	1.09	0.78
time 2	Wenchang	103	765	17.25	16.46			0.38	2.62	6.7	2.23	56.37	0.97
time 2	Wenchang	104	745	16.83	14.6	4.12	3.84	0.27	2.45	6.41	3.75	95.68	0.92	1.97
time 2	Wenchang	105	777	17.13	16.7	6.27	3.75	0.24	2.34				1.16	2.66
time 2	Wenchang	106	936	18.38	18.66			0.34	2.35	9.83	2.37	84.66	0.53
time 2	Wenchang	107	950	16.49	16.61	5.03	4.81	0.23	1.83	9.13	3.54	155.52	1.29	3.17
time 2	Wenchang	108	1219	17.71	16.83			0.34	2.49	9.33	6.8	394.4	1.07
time 2	Wenchang	109	1074	20.13	16.62	1.36	0.89	0.24	2.08	8.25	6.16	263.56	0.94	1.21
time 2	Wenchang	110	1346	18.12	18.47	1.97	1.94	0.37	2.86	9.79	4.11	260.3	1.21	1.78
time 2	Wenchang	111	878	17.01	16.65			0.19	2	6.35	2.05	43.94	1.26
time 2	Wenchang	112	796	16.19	14.05			0.14	1.61	8.21	5.54	244.6	0.88
time 2	Wenchang	113	970	19.26	18.32			0.29	3.35				1.13
time 2	Wenchang	114	922	16.55	15.23	1.93	1.56	0.19	1.4	9.33	4.56	237.95	0.88	1.42
time 2	Wenchang	115	736	18.87	16.32			0.17	2.66	7.31	5.65	184.86	0.77
time 2	Wenchang	116	966	18.74	16.45	5.1	5	0.19	2.21	8.16	3.56	127.87	1.24	2.74
time 2	Wenchang	117	1087	18.63	16.65			0.18	1.91	8.68	5.71	234.87	1.15
time 2	Wenchang	118	914	17.19	15.34			0.39	3.04	7.04	4.79	168.13	1.16	0.59
time 2	Wenchang	119	1132	21.21	16.06	0.97	1.02	0.29	1.81	8.6	6.07	242.79	1.06	0.81
time 2	Wenchang	120	1095	19.61	15.98	1.36	1.27	0.19	1.63	8.53	6.83	303.87	1.2	1.46
time 2	Wenchang	121	1060	18.71	16.15	1.45	1.4	0.25	2.38	8.06	7.11	274.88	0.85	1.22
time 2	Wenchang	122	1218	20.73	16.11	1.53	1.2	0.32	1.71	8.8	7.22	346.69	1.11	1.35
time 2	Wenchang	123	1319	17.4	16.82	1.61	1.24	0.19	1.9	10.14	6.3	414.2	0.95	1.57
time 2	Wenchang	124	1147	18.51	16.11	3.2	2.69	0.26	1.75	9.04	5.85	336.8	1.23	2
time 2	Wenchang	125	1033	18.11	16.01			0.25	1.7	9.22	4.29	228.33	0.99
time 2	Wenchang	126	670	17.72	14.18	1.36	1.25	0.21	2.53	6.35	4.26	108.33	1.21
time 2	Wenchang	127	1126	18.97	16.49			0.23	1.46	9.58	5.91	330.58	1.06
time 2	Wenchang	128	854	17.65	16.06	9.77	9.15	0.31	3.09				0.77	16.08
time 3	Wenchang	101	1245.2	20.02	17.51	4.57	4.55	0.23	4.15	8.59	8.21	219.17	1.11	3.41
time 3	Wenchang	102	1057.5	19.8	15.63	5.7	4.15	0.31	2.29	8.03	7.65	250.23	1.21	0.59
time 3	Wenchang	103	762.4	16.56	16.03	1.03	0.82	0.32	2.43	6.56	2.1	46.19	1.04	0.28
time 3	Wenchang	104	740.2	17.24	14.62	4.77	4.68	0.32	2.42	6.59	3.69	86.03	1.01	2.38
time 3	Wenchang	105	768.3	17.1	16.69	6.23	3.79	0.24	2.24			0	0.88	3.27
time 3	Wenchang	106	875.7	18.46	18.5			0.33	2.02	9.65	2.03	67.87	0.6
time 3	Wenchang	107	936	16.57	16.3	5.94	5.91	0.25	2.09	8.81	3.13	92.85	1.36	3.66
time 3	Wenchang	108	1189.9	18.42	16.34			0.19	2.39	9.53	6.37	324.86	0.93
time 3	Wenchang	109	1066.6	20.4	16.98	1.85	1.69	0.27	2.29	8.18	5.94	224.31	1.13	1.91
time 3	Wenchang	110	1329.8	18.41	18.23	3.03	2.83	0.27	2.79	9.76	4.25	212.35	1.12	2.5
time 3	Wenchang	111	858	18.05	16.53			0.18	2.62	5.39	1.44	27.53	1.36
time 3	Wenchang	112	778.3	15.92	14.02	0.98	0.73	0.12	1.84	8.32	5.1	202.97	0.96	0.53
time 3	Wenchang	113	939.4	19.73	19.45			0.37	4.04			0	1.2
time 3	Wenchang	114	900	16.62	15.25	2.68	2.18	0.18	1.47	9.13	4.38	228.12	1.09	1.64
time 3	Wenchang	115	704.2	18.82	15.93			0.21	3.21	7.65	5.14	174.6	0.58
time 3	Wenchang	116	945.7	16.74	16.62	5.99	5.63	0.26	2.46	8.06	3.14	113.21	1.19	3.18
time 3	Wenchang	117	1068.2	19.12	16.56			0.22	2.3	8.53	5.5	228.39	1.17
time 3	Wenchang	118	886.1	17.27	16.23	1.12	0.98	0.19	2.7	7.59	4.4	180.06	1.39	1.4
time 3	Wenchang	119	1110.6	21.25	16.14	1.36	1.26	0.19	1.72	8.68	5.91	237.53	1.18	1.52
time 3	Wenchang	120	1071	21.62	15.96	1.61	1.41	0.26	1.6	8.52	6.41	300.56	1.27	1.99
time 3	Wenchang	121	1037.1	17.66	16.13	2.66	2.08	0.25	2.57	8.11	6.22	243.27	0.88	1.69
time 3	Wenchang	122	1197.4	20.4	15.94	3.13	2.56	0.26	2.32	8.62	6.89	318.38	1.04	1.94
time 3	Wenchang	123	1287	18.34	16.7	2.59	1.74	0.32	2.08	9.98	5.65	372.48	1.06	2.09
time 3	Wenchang	124	1111.6	18.6	15.93	4.65	4.62	0.31	1.84	8.81	5.37	301.88	1.3	2.65
time 3	Wenchang	125	1014.9	17.58	16.04			0.23	1.74	9.16	4.01	200.37	1.18
time 3	Wenchang	126	653.9	17.58	13.94			0.22	2.06	6.1	3.84	92.86	1.18
time 3	Wenchang	127	1103.2	17.33	16.25			0.23	2.59	9.24	5.24	300.87	1.27
time 3	Wenchang	128	820.97	17.37	16.44	9.74	8.75	0.27	2.34			0	0.72	13.15
time 4	Wenchang	101	1218		20.23	6.18	6.08	0.23	3.95	8.29	4.09	208.63	1.23	5.49
time 4	Wenchang	102	1031	20.32	17.08	7.57	5.6	0.26	2.15	7.7	7.06	264.76	1.16	0.63
time 4	Wenchang	103	746	17.28	16.67			0.29	2.37	4.04	0.83	15.9	1.02
time 4	Wenchang	104	723	16.92	14.75	5.7	5.57	0.29	2.64	5.2	2.41	55.95	1.03	2.71
time 4	Wenchang	105	745	16.92	16.76	6.07	3.63	0.22	2.37			0	1.01
time 4	Wenchang	106	774	18.27	18.29			0.14	2.17	4.93	0.37	18.61	0.51
time 4	Wenchang	107	905	16.61	16.36	7.4	6.84	0.25	1.98	8.49	2.05	95.74	1.27	10.29
time 4	Wenchang	108	1132	18.46	16.8			0.31	2.53	9.21	5.31	316.11	0.97
time 4	Wenchang	109	1045	21.33	17	4.51	4.38	0.25	2.03	8.13	5.06	248.28	1.17	3.22
time 4	Wenchang	110	1311	19.94	18.83	3.92	3.71	0.19	3.03	9.83	3.61	233.52	1.32	3.35
time 4	Wenchang	111	830	17.31	16.69			0.15	1.98			0	1.27
time 4	Wenchang	112	765	15.93	14.28	1.07	1.56	0.14	1.91	8.21	4.49	211.56	1.11	1.09
time 4	Wenchang	113	924	20.45	18.22			0.23	2.48			0	1.15
time 4	Wenchang	114	886	16.59	15.62	4.94	4.6	0.1	1.44	8.91	3.93	260.94	1.39	2.5
time 4	Wenchang	115	676	20	16.45			0.42	2.5	8.09	5.47	172.94
time 4	Wenchang	116	927	18.27	16.72	6.88	6.14	0.28	2.18	7.57	2.46	12.9	1.31	3.3
time 4	Wenchang	117	1058	19.1	16.5			0.28	1.75	8.73	5.38	260.5	1.23
time 4	Wenchang	118	872	18.44	16.59	2.11	2.57	0.23	2.73	7.49	4.1	198.46	1.01	2.39
time 4	Wenchang	119	1096	22.09	16.1	3.17	2.77	0.26	1.76	8.67	5.46	269.84	0.97	2.94
time 4	Wenchang	120	1054	21.26	15.57	2.3	2.26	0.17	1.66	8.59	6.05	324.38	1.26	2.72
time 4	Wenchang	121	1021	17.79	16.18	4.44	4.39	0.2	2.5	8.09	5.52	247.18	0.79	2.72
time 4	Wenchang	122	1180	20.85	15.93	5.54	5.24	0.33	2.08	8.65	5.88	344.01	1.04	3.82
time 4	Wenchang	123	1266	19.23	16.76	4.03	3.83	0.26	1.87	10.11	5.21	358.01	1.11	4.89
time 4	Wenchang	124	1085	20.06	16.17	6.35	6.03	0.28	1.83	8.79	4.52	299.9	1.23	4.05
time 4	Wenchang	125	1008	17.88	16.21	1.08	0.88	0.28	1.8	9.3	3.79	201.06	1.12	0.78
time 4	Wenchang	126	645	17.65	13.99	1.72	1.28	0.27	1.92	6.02	3.42	92.16	1.11
time 4	Wenchang	127	1092	18.26	16.01	1.05	0.92	0.28	1.14	9.38	4.77	303.81	1.22	0.51
time 4	Wenchang	128	801	17.1	16.49	9.2	8.77	0.17	1.78			0	0.89	12.34
time 5	Wenchang	101	1200	19.6	19.47	7.07	6.83	0.24	4.36	8.52	3.67	169.82	1.22	6.16
time 5	Wenchang	102	1010	20.49	16.73	8.38	5.82	0.33	1.77	7.56	6.7	214.82	1.05	0.81
time 5	Wenchang	103	732	16.97	16.6			0.3	2.36			0	1.03
time 5	Wenchang	104	708	17.14	14.41	6.08	5.99	0.21	2.65	5.41	1.77	39.65	0.93	2.51
time 5	Wenchang	105	727	17.69	16.68	5.77	3.54	0.16	2.16			0	0.9
time 5	Wenchang	106	733	18.36	18.09			0.39	2.17			0	0.6
time 5	Wenchang	107	886	16.52	15.79	7.29	6.89	0.29	2.08	7.39	1.8	42.75	1.22	10.28
time 5	Wenchang	108	1103	18.4	16.57			0.24	2.35	9.46	4.95	279.15	1.05
time 5	Wenchang	109	1034	19.92	16.99	6.23	6.11	0.26	1.98	8.28	4.39	202.4	1.23	3.54
time 5	Wenchang	110	1301	19.67	18.47	4.98	4.89	0.31	2.92	9.94	3.32	183.25	1.24	3.66
time 5	Wenchang	111	813	17.11	16.52			0.21	2.05			0	1.34
time 5	Wenchang	112	754	10.88	14.11	2.73	2.04	0.22	2.01	8.28	4.31	177.72	0.95	1.3
time 5	Wenchang	113	895	19.93	18.33			0.42	3.23			0	1.1
time 5	Wenchang	114	868	17.81	15.72	5.95	5.48	0.26	1.53	9.05	3.57	197.79	1.05	2.51
time 5	Wenchang	115	654	19.1	15.98			0.23	2.86	8.16	4.86	146.55
time 5	Wenchang	116	906	16.99	16.54	7.39	6.51	0.19	2.1	7.23	2.16	94.85	1.32	3.59
time 5	Wenchang	117	1040	19.09	16.66			0.28	2.27	8.81	4.87	212.67	1.07
time 5	Wenchang	118	862	18.18	16.33	3.9	3.49	0.31	2.7	7.07	3.13	158.79	1.16	2.47
time 5	Wenchang	119	1088	20.81	16.14	4.49	4.41	0.21	1.91	8.81	5.02	225.4	1.14	4.12
time 5	Wenchang	120	1042	21.22	16.01	3.89	3.52	0.35	1.84	8.85	5.35	299.51	1.29	2.71
time 5	Wenchang	121	1008	17.7	16.38	5.29	5.15	0.26	3.19	7.78	4.85	223.7	0.94	3.43
time 5	Wenchang	122	1170	20.75	15.88	6.98	6.35	0.38	2.12	8.9	5.74	292.55	1.14	4.03
time 5	Wenchang	123	1253	19.28	16.79	4.7	4.67	0.24	1.95	9.93	4.85	346.36	1.2	3.97
time 5	Wenchang	124	1063	19.7	16.04	7.39	6.63	0.31	1.89	8.93	4.27	250.56	1.08	5.99
time 5	Wenchang	125	993	18.25	16.03	1.74	1.07	0.38	1.99	9.09	3.82	200.76	1.21	1.22
time 5	Wenchang	126	630	18.21	14.14	1.84	1.36	0.27	1.6	6.27	3.04	68.97	1.23
time 5	Wenchang	127	1073	19.15	16.73	1.27	1.16	0.28	2.08	9.26	4.93	269.56	1.27	1.18
time 5	Wenchang	128	774	16.76	17.63	9.78	6.82	0.38	3.09			0	0.8
